# Supplementary material for: Protein-coated pH-responsive gold nanoparticles: Microwave-assisted synthesis and surface charge-dependent anticancer activity
Source: publisher site journal article supplement (doi:10.3762/bjnano.5.158), 2014-09-04
Supplement: Additional file 1 [file 2190-4286-5-158-S1.pdf]

## **Supporting Information**

for

### **Protein-coated pH-responsive gold nanoparticles: Microwave-assisted synthesis and surface charge-dependent anticancer activity**

Dickson Joseph<sup>1</sup>, Nisha Tyagi<sup>1</sup>, Christian Geckeler<sup>2</sup> and Kurt E. Geckeler<sup>\*1,2,3,§</sup>

Address: <sup>1</sup>Department of Nanobio Materials and Electronics (WCU), Gwangju Institute of Science & Technology (GIST), Gwangju 500-712, South Korea; <sup>2</sup>Department of Materials Science and Engineering, Gwangju Institute of Science & Technology (GIST), Gwangju 500-712, South Korea and <sup>3</sup>Institute of Medical System Engineering, Gwangju Institute of Science & Technology (GIST), Gwangju 500-712, South Korea.

E-mail: Kurt E. Geckeler\* - [keg@gist.ac.kr](mailto:keg@gist.ac.kr)

\* Corresponding author

§Fax: (+82-62-715-2338) Tel: (+82-62-715-2316)

### **Additional experimental data**

**Table S1:** Composition of amino acid residues in each protein.<sup>a</sup>

| Amino Acid                           | Proteins (%) |       |       |       |       |       |
|--------------------------------------|--------------|-------|-------|-------|-------|-------|
| Residue                              | HIS          | LYS   | OVA   | BHG   | BSA   | TRY   |
| Hydrophobic<br>(V, I, L, M, F, W, C) | 24.61        | 33.68 | 38.58 | 34.94 | 30.85 | 33.45 |
| Aromatic<br>(F, W, Y, H)             | 8.5          | 15.25 | 14.18 | 19.56 | 14.93 | 16.81 |
| Basic<br>(R, K, H)                   | 30.24        | 18.32 | 13.65 | 20.5  | 20.26 | 11.87 |
| Acidic<br>(E, D)                     | 8.13         | 7.42  | 13.67 | 11.71 | 18.36 | 5.09  |
| Charged<br>(R, K, E, D)              | 34.44        | 24.78 | 25.09 | 25.14 | 35.12 | 13.79 |
| Polar<br>(R, K, D, E, N, Q)          | 43.95        | 38.61 | 34.08 | 30.46 | 41.37 | 28.68 |

<sup>a</sup>The amino acid residues, R: Arginine, N: Asparagine, D: Aspartic Acid, C: Cysteine, Q: Glutamine, E: Glutamic Acid, H: Histidine, I: Isoleucine, L: Leucine, K: Lysine, M: Methionine, F: Phenylalanine, W: Tryptophan, Y: Tyrosine, V: Valine.

**Table S2:** pH, I.E.P, zeta potential and size of the AuNPs prepared using different proteins.

| Protein | pH   | I.E.P | Zeta potential(mV) | Size distribution (nm) |       |
|---------|------|-------|--------------------|------------------------|-------|
|         |      |       |                    | DLS                    | TEM   |
| HIS     | 3.23 | 10.58 | 49.09              | 20.7 ± 5.9             | 9.16  |
| LYS     | 3.03 | 8.40  | 40.06              | 35.1 ± 10.3            | 13.20 |
| OVA     | 3.24 | 5.08  | 31.15              | 27.4 ± 7.6             | 10.85 |
| BHG     | 3.35 | 7.56  | 38.81              | 28.2 ± 7.6             | 13.46 |
| BSA     | 2.97 | 6.16  | 33.92              | 31.0 ± 8.7             | 6.91  |
| BGG     | 2.82 | 7.88  | 23.84              | 21.3 ± 6.1             | 7.59  |

**Table S3:** IC<sub>50</sub> values of the AuNPs prepared using different proteins for four cell line variants.

| Proteins | IC <sub>50</sub> (μg/mL) |         |       |       |
|----------|--------------------------|---------|-------|-------|
|          | NIH-3T3                  | HCT-116 | Hela  | SCC-7 |
| HIS      | 28.87                    | 20.6    | 23.9  | 17.86 |
| LYS      | 63.32                    | 59.94   | 63.5  | 30    |
| OVA      | 82.27                    | 74.11   | 80.48 | 57.25 |
| BHG      | 66.94                    | 30.2    | 39.7  | 30.86 |
| BSA      | 68.2                     | 49.5    | 32.68 | 37.19 |
| BGG      | 62.8                     | 63.4    | 68.6  | 52.9  |

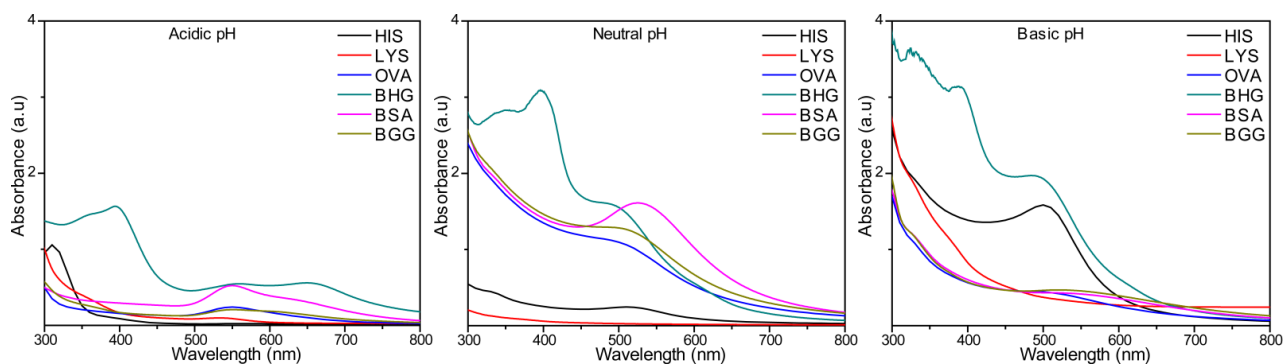

**Figure S1:** UV-Vis spectral studies on the preparation AuNPs at acidic, neutral and basic pH conditions.

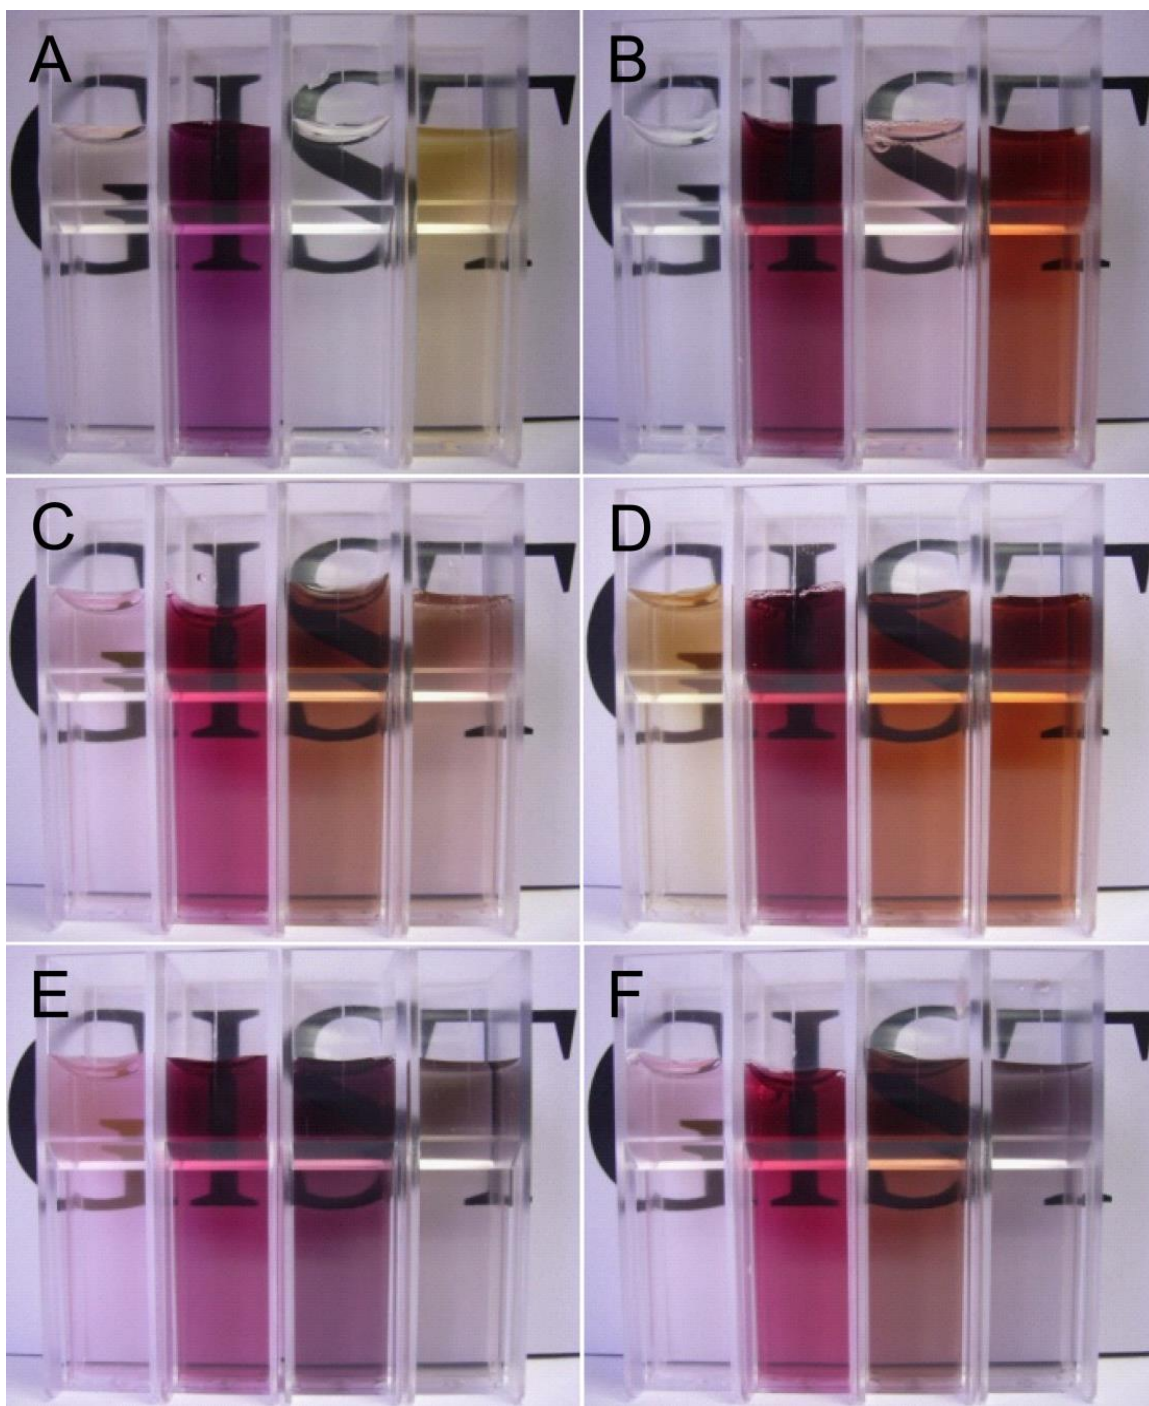

**Figure S2:** Photographs of the dispersions after the microwave irradiation under different pH conditions; acidic, intrinsic, neutral and basic (left to right) for reaction carried out using different proteins: (A) HIS, (B) LYS, (C) OVA, (D) BHG, (E) BSA and (F) BGG.

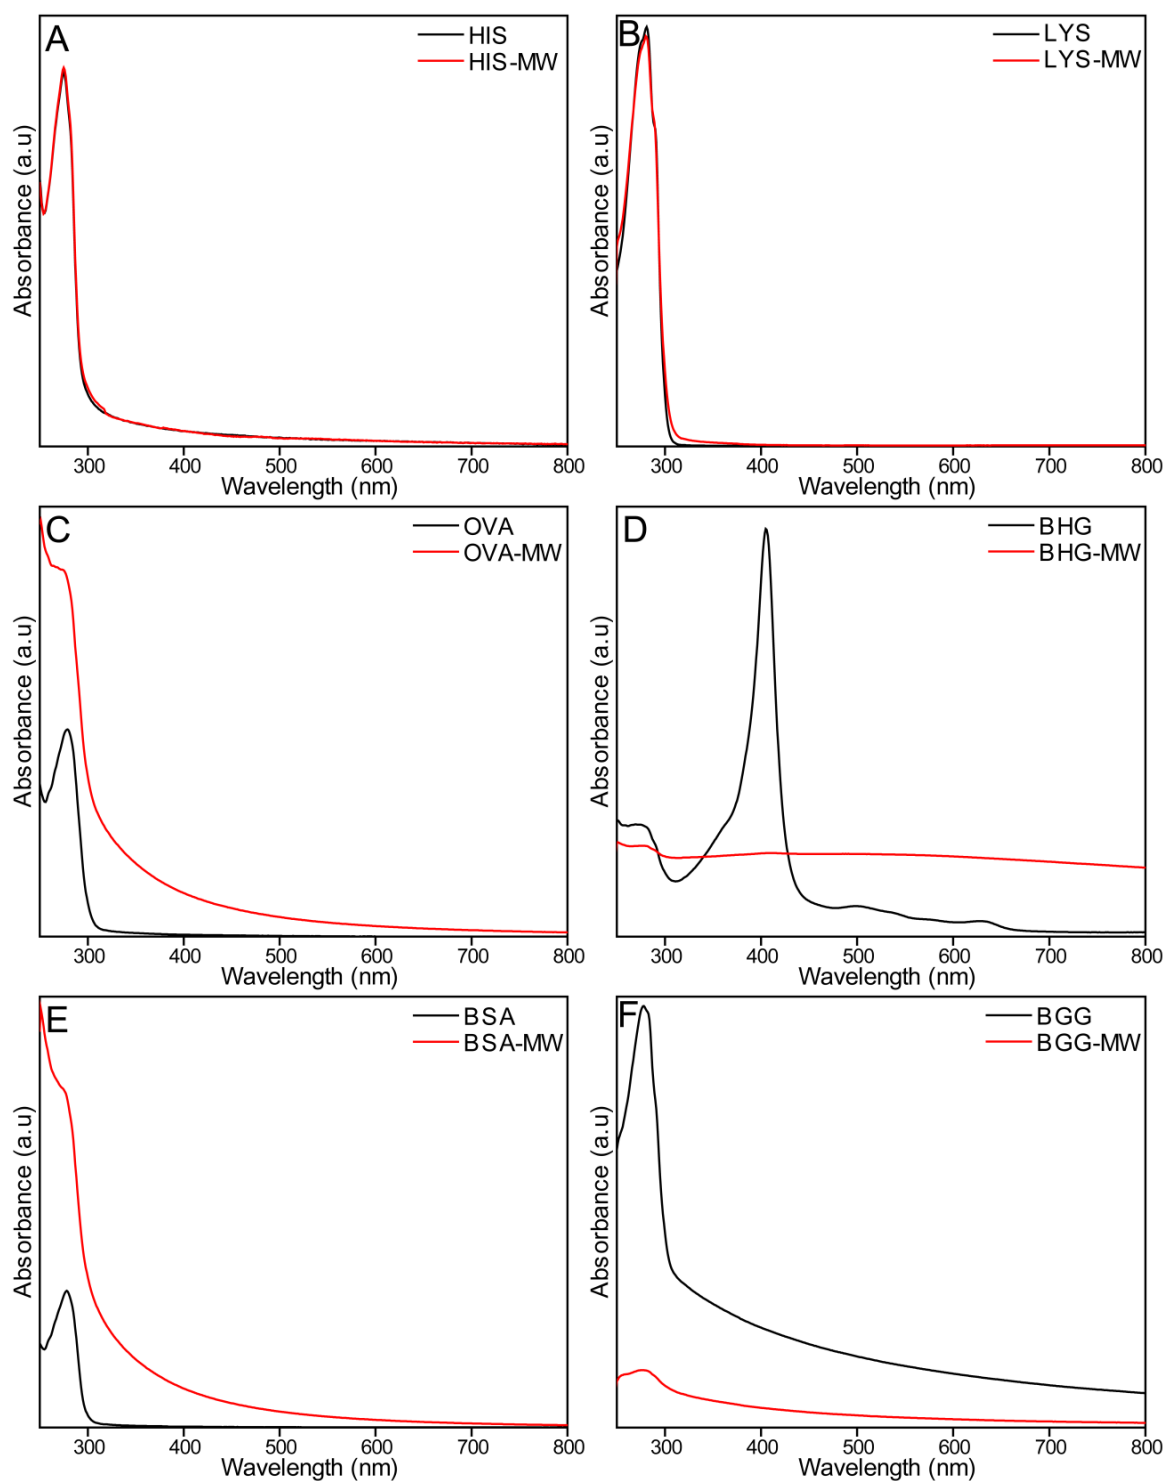

**Figure S3:** UV-Vis spectra of different blank proteins: (A) HIS, (B) LYS, (C) OVA, (D) BHG, (E) BSA and (F) BGG that where microwave irradiated and non-irradiated.

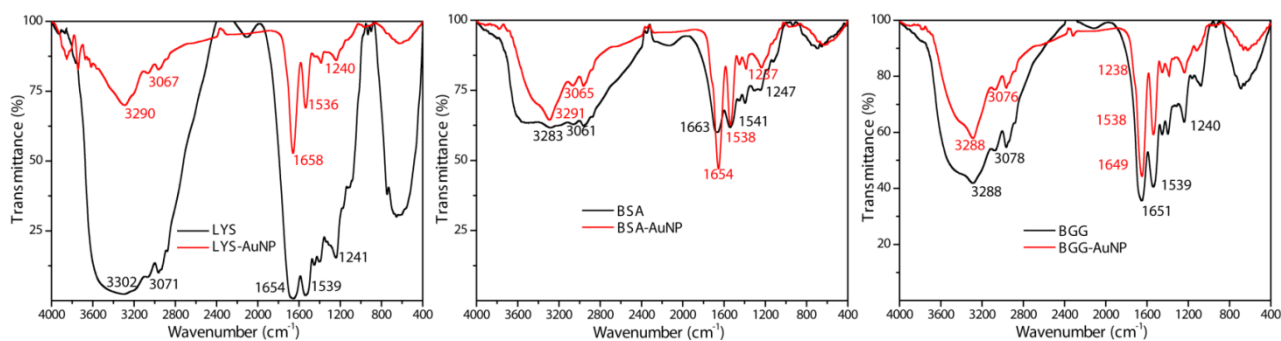

**Figure S4:** FT-IR spectra of blank proteins (black) and AuNPs prepared using corresponding proteins (red).

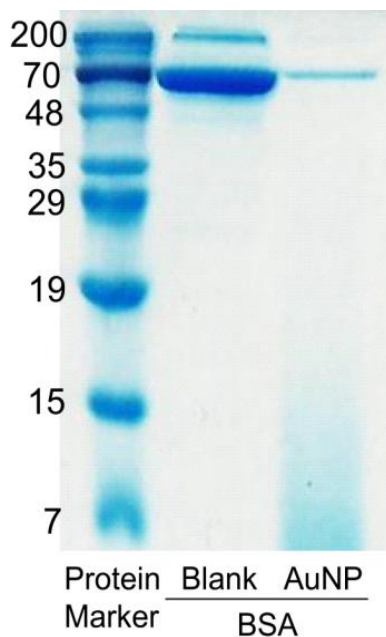

**Figure S5:** Electrophoresis profile of BSA in a gel after the synthesis of AuNPs as followed by SDS-PAGE; molecular weight marker (lane 1), blank BSA (lane 2), AuNPs prepared using BSA (lane 3).

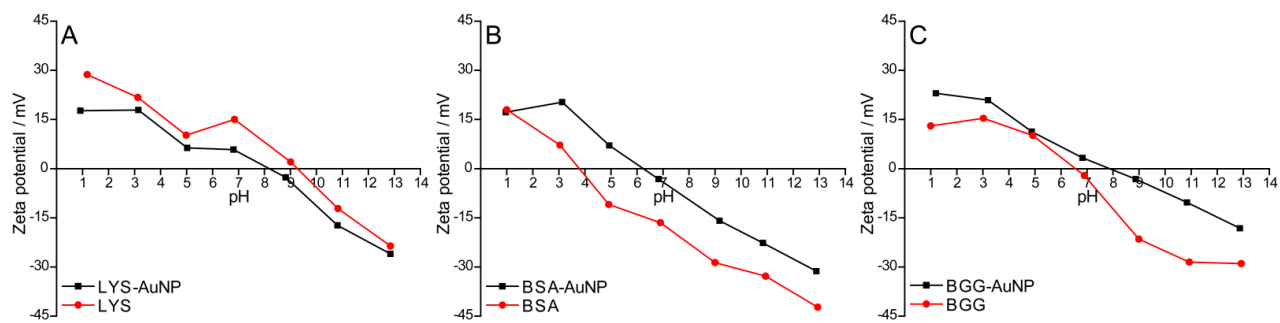

**Figure S6:** Variation in the zeta potential of AuNPs and blank proteins (A) LYS, (B) BSA and (C) BGG as a function of the pH in aqueous medium.



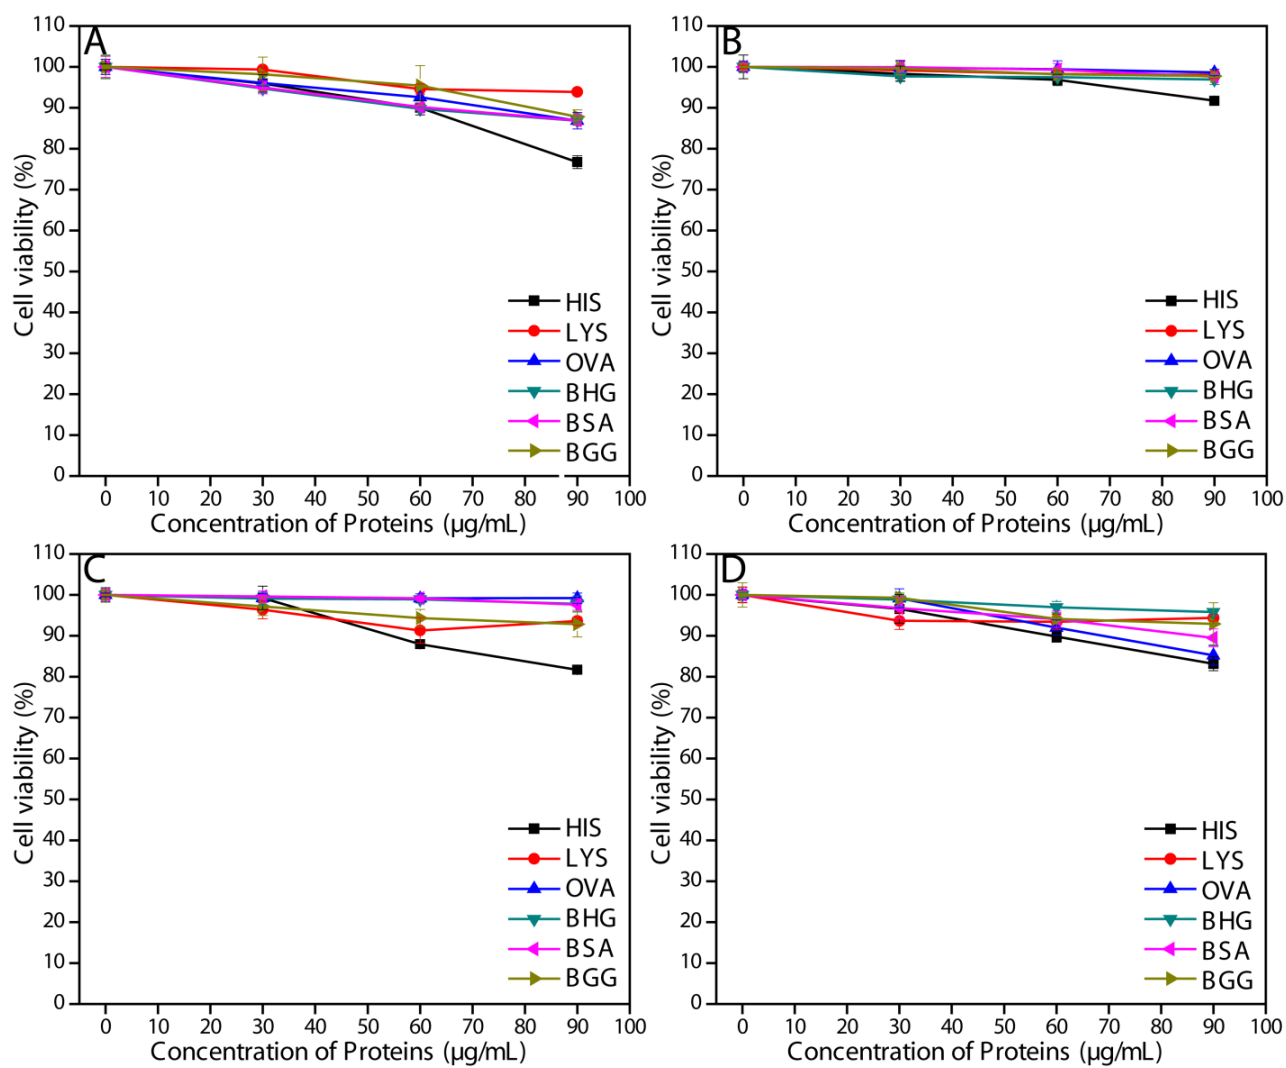

**Figure S7:** Cell viability studies using MTT assay on (A) NIH-3T3, (B) HCT116, (C) HeLa and (D) SCC7 cells treated with different blank proteins.
